# Supplementary material for: Animal Detection and Classification from Camera Trap Images Using Different Mainstream Object Detection Architectures
Source: MDPI journal article supplement (doi:10.3390/ani12151976), 2022-08-04
Supplement: s1 [file s1]

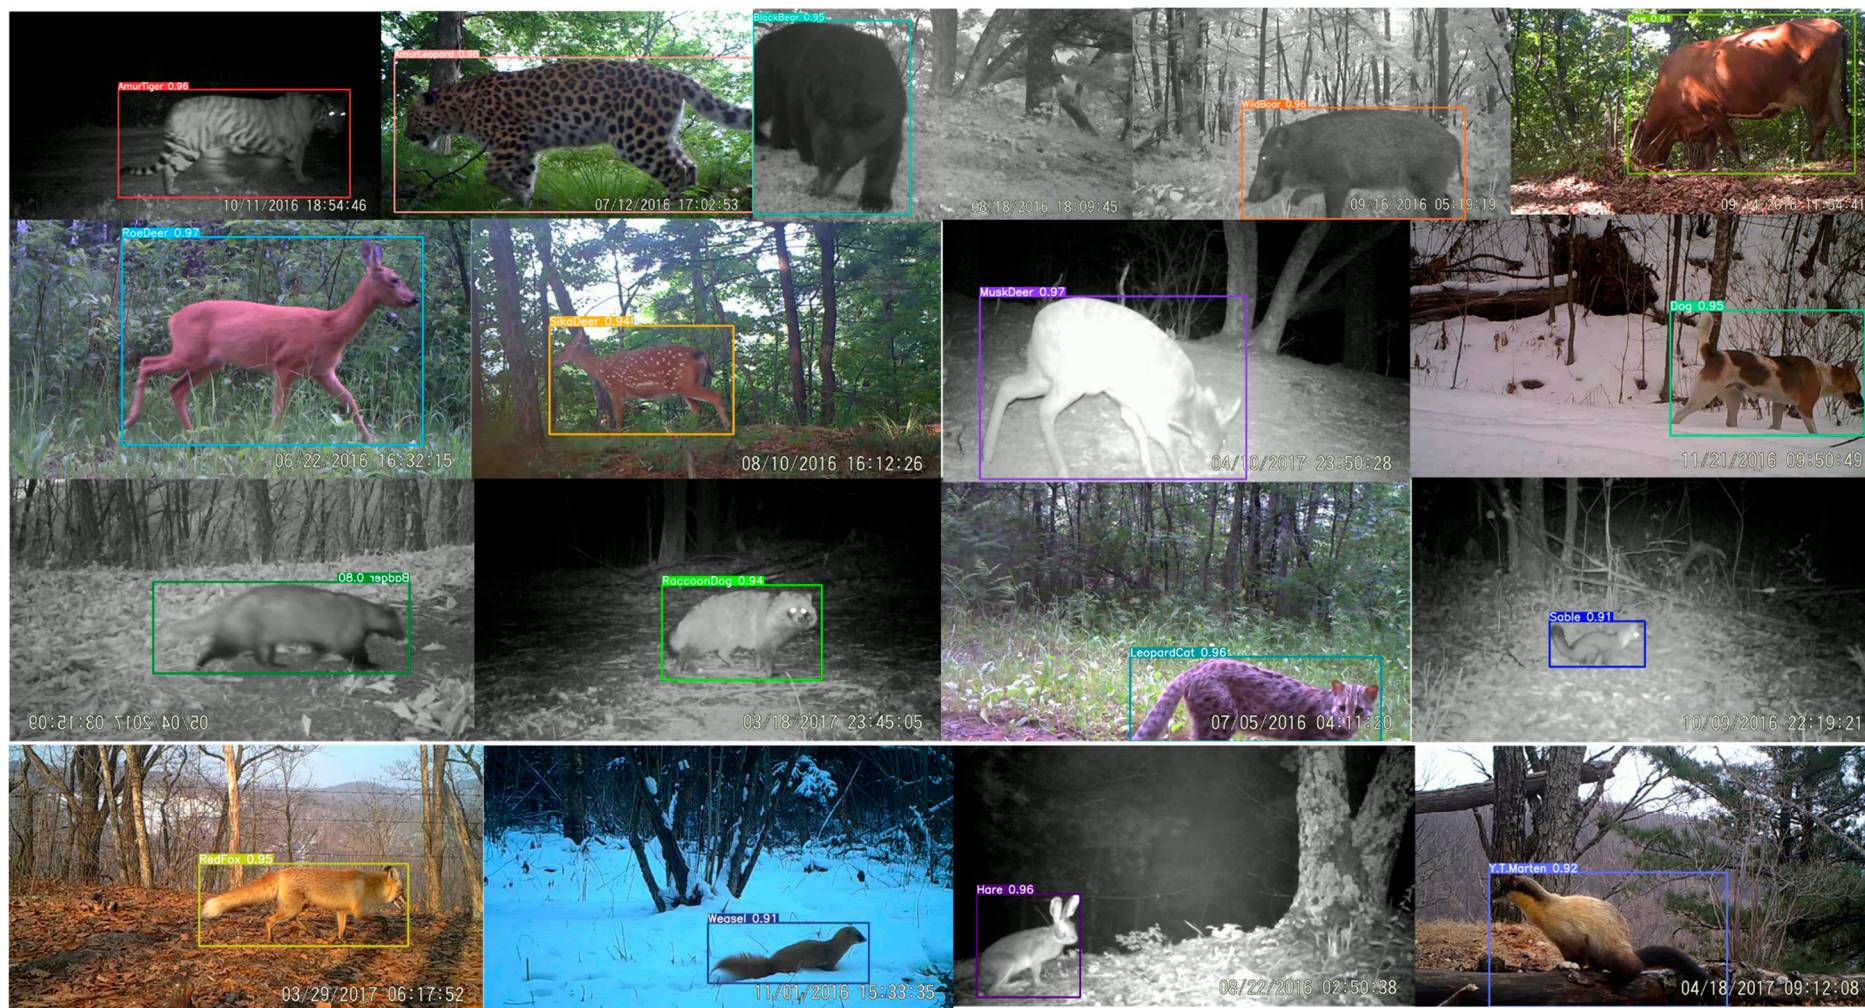

Figure S1 Examples of correct animal detection and classification using YOLOV5m network



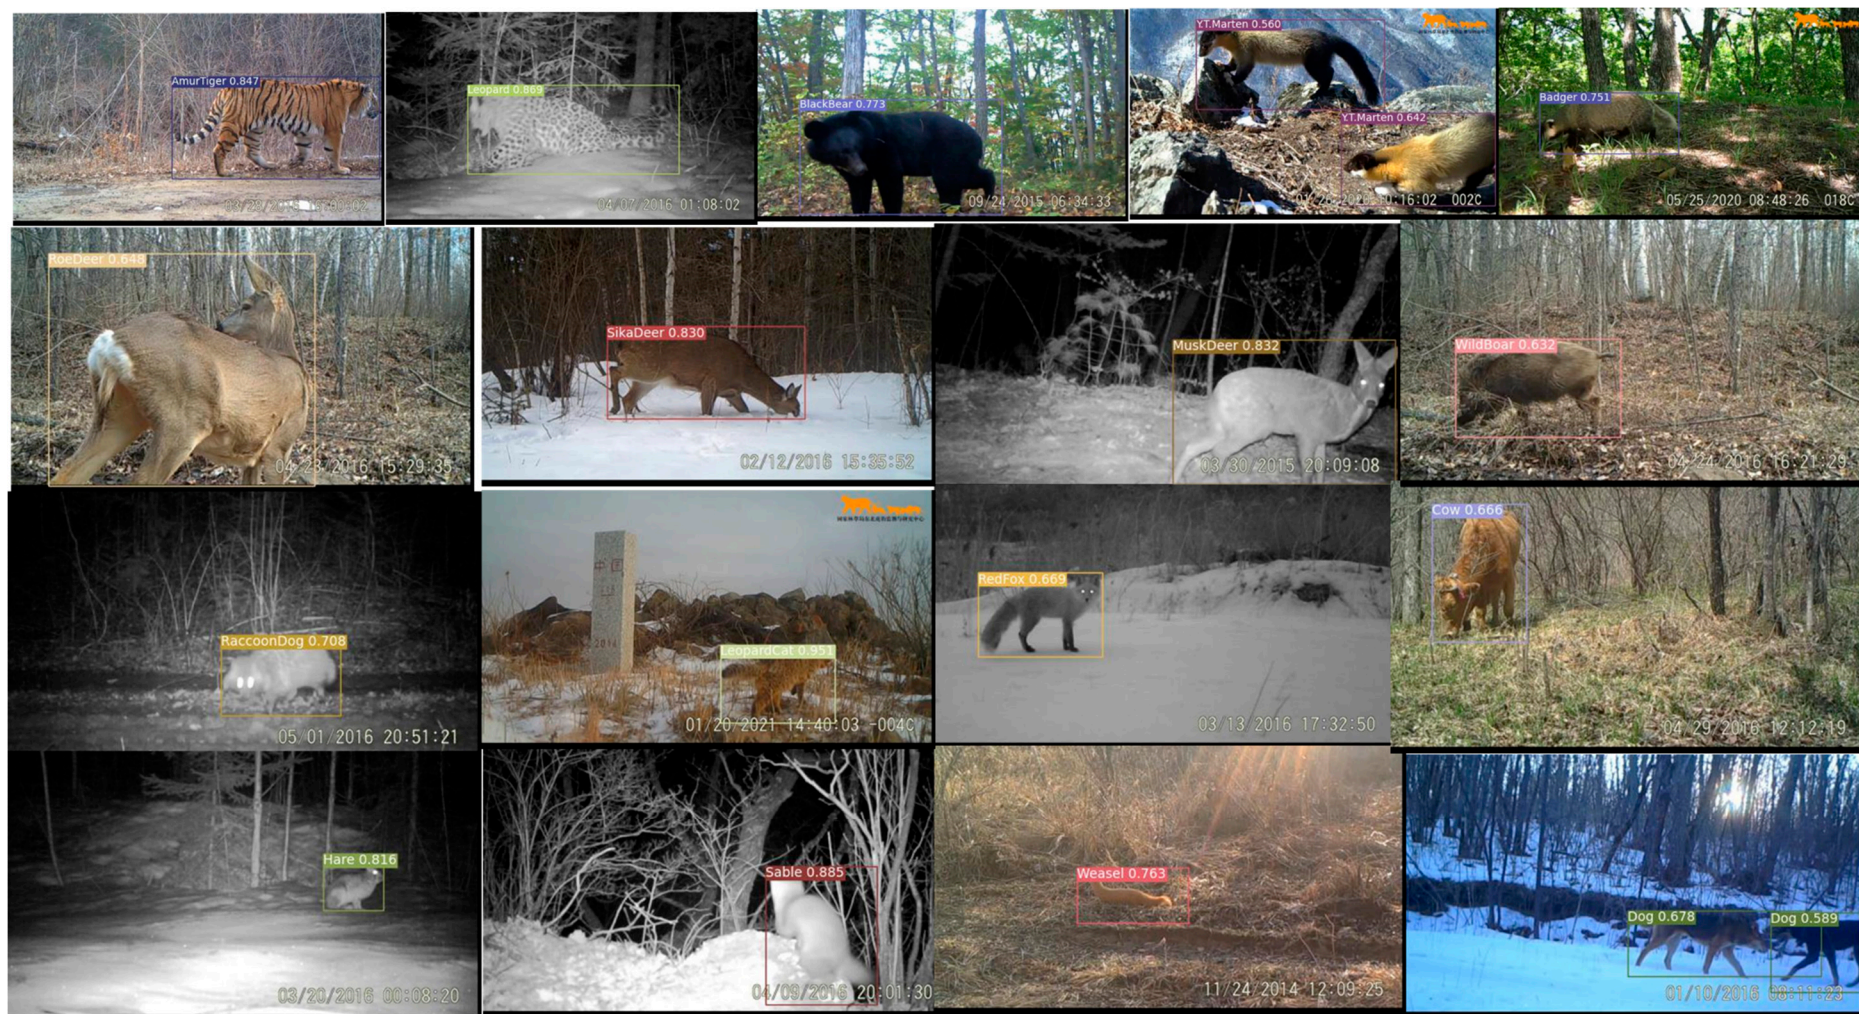

Figure S2 Examples of correct animal detection and classification using FCOS\_Resnet101



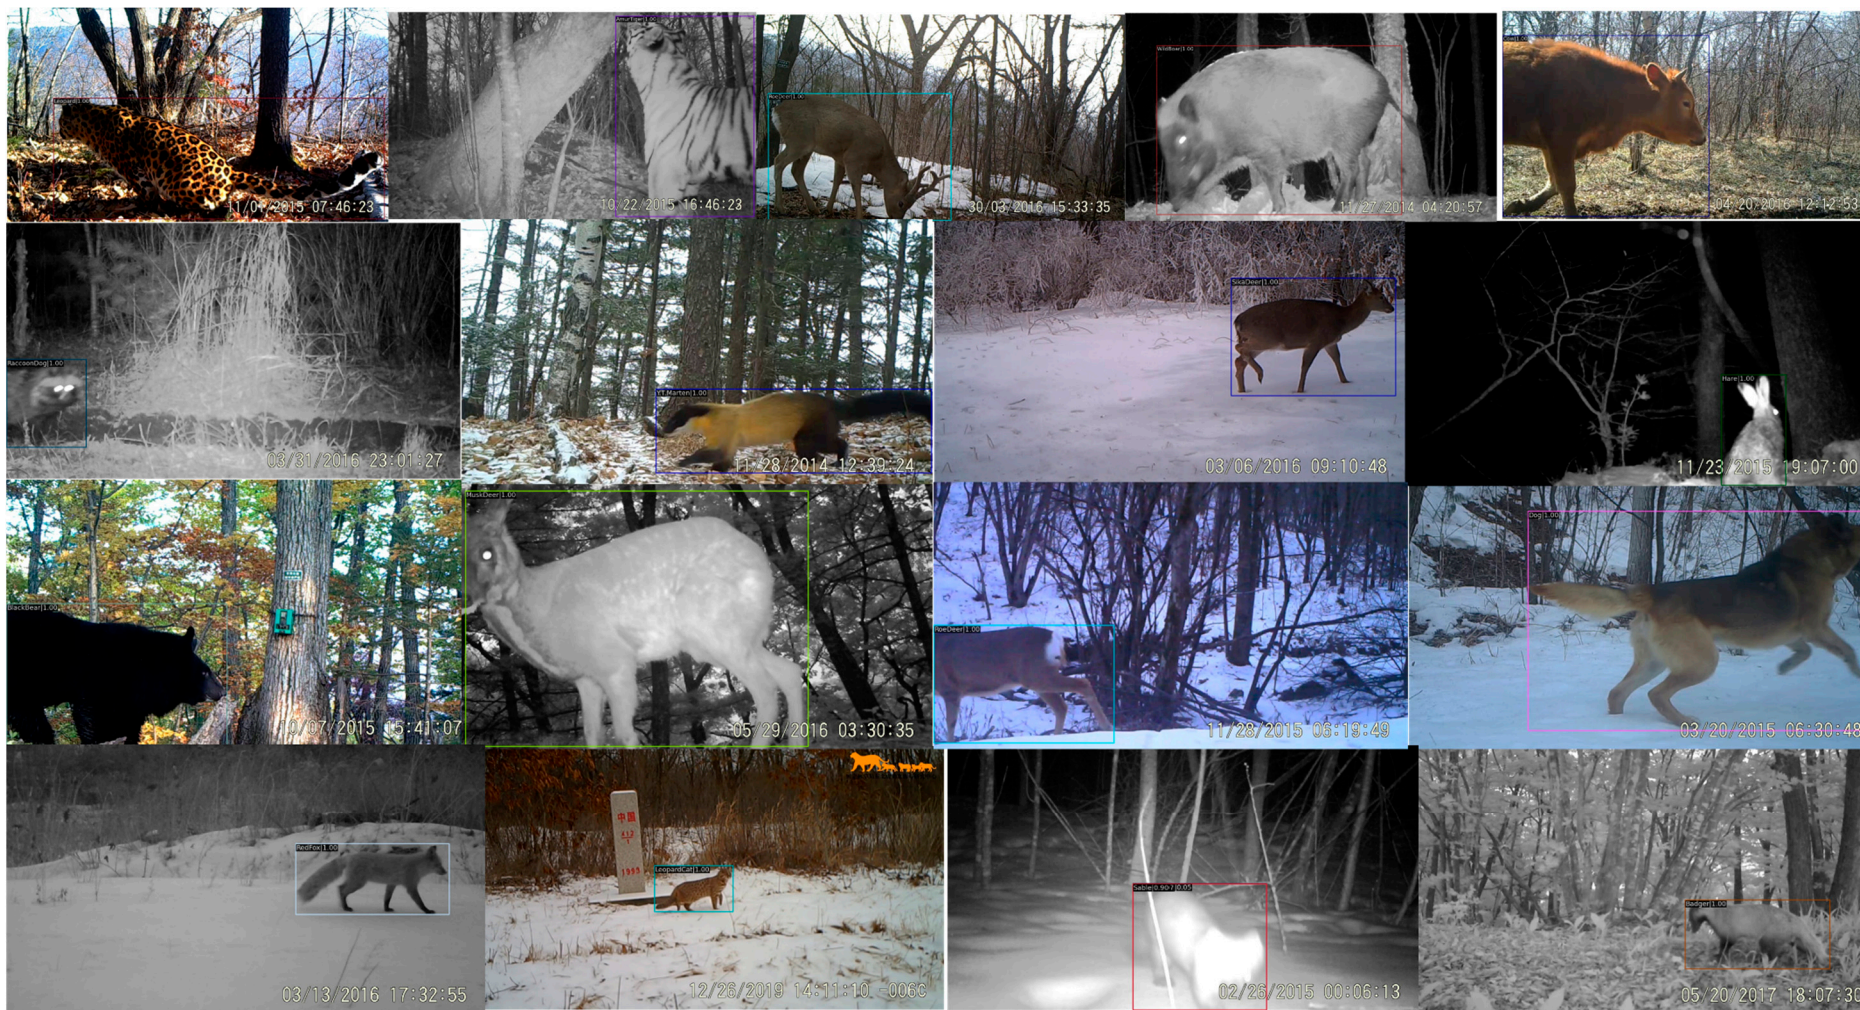

Figure S3 Examples of correct animal detection and classification using Cascade\_RCNN\_HRNet32
